# Supplementary material
Source: PubMed Central journal article supplement (PMC2861407)
Supplement: jp101894k_si_001.pdf [file jp101894k_si_001.pdf]

# Supporting information for

## How Does the Reductase Help Regulating the Catalytic Cycle of Cytochrome P450 3A4 Using the Conserved Water Channel?

*Dan Fishelovitch, Sason Shaik, Haim J. Wolfson, Ruth Nussinov*

### **Table of contents:**

- 1. Ferric heme topology**
- 2. Testosterone topology file**
- 3. Ferric heme QM/MM optimized coordinates**
- 4. Additional figures**
- 5. Calculated *PKa* values**

# 1. Ferric heme topology

```

RESI HEC2      -2.00
!cysteine
GROUP
ATOM N      NH1    -0.57!      |
ATOM HN     H      0.40!      HN-N
ATOM CA     CT1    -0.01!      |      HB1
ATOM HAY    HB     0.18!      |
GROUP      ! HAY-CA--CB--SG      move definition of HA-->HAY
ATOM CB     CS     -0.37!      |      HB2      \
ATOM HB1    HA     0.20!      |      (FE)
ATOM HB2    HA     0.20!      O=C
ATOM SG     SS     -0.03!      |
GROUP
ATOM C      C      0.50
ATOM O      O     -0.50
GROUP
ATOM FE     FE     0.74!
ATOM NA     NPH   -0.77!      O2A  O1A
ATOM NB     NPH   -0.77!      \ \ // //
ATOM NC     NPH   -0.77!      CGA      CGD
ATOM ND     NPH   -0.77!      |      |
ATOM C1A    CPA   0.27!      HBA1--CBA--HBA2  HA  HBD1--CBD--HBD2
ATOM C2A    CPB   0.04!      HAA1--CAA--HAA2  _CHA_ HAD1--CAD--HAD2
ATOM C3A    CPB   0.04!      |      |
ATOM C4A    CPA   0.27!      C2A---C1A      C4D---C3D
ATOM C1B    CPA   0.27!      |      |
ATOM C2B    CPB   0.04!HMA1\      |      |      /HMD1
ATOM C3B    CPB  -0.04!HMA2-CMA--C3A  NA  ND  C2D--CMD--HMD2
ATOM C4B    CPA   0.27!HMA3/      \ \ // //      \HMD3
ATOM C1C    CPA   0.27!      C4A      C1D
ATOM C2C    CPB   0.04!      /      \
ATOM C3C    CPB  -0.02!      HB--CHB      FE      CHD--HD
ATOM C4C    CPA   0.27!      \      /
ATOM C1D    CPA   0.27!      C1B      C4C      HAC
ATOM C2D    CPB   0.04!HMB1\      /      \
ATOM C3D    CPB   0.04!HMB2-CMB--C2B  NB  NC  C3C--CAC
ATOM C4D    CPA   0.27!HMB3/      |      |      \ \ /HBC1
GROUP      !      |      |      CBC
ATOM CHA    CPM  -0.13!      C3B---C4B      C1C---C2C      \HBC2
ATOM HA     HA    0.13!      |      |
GROUP      !      CAB      \_CHC_/      CMC--HMC3
ATOM CHB    CPM  -0.13!      // \
ATOM HB     HA    0.13!      CBB  HAB      HMC1  HMC2
GROUP      !      / \
ATOM CHC    CPM  -0.13!      HBB1  HBB2
ATOM HC     HA    0.13!
GROUP
ATOM CHD    CPM  -0.13
ATOM HD     HA    0.13
GROUP
ATOM CMA    CT3   -0.48
ATOM HMA1   HA     0.16
ATOM HMA2   HA     0.16
ATOM HMA3   HA     0.16
GROUP
ATOM CAA    CT2   -0.30
ATOM HAA1   HA     0.15

```

|           |     |       |
|-----------|-----|-------|
| ATOM HAA2 | HA  | 0.15  |
| GROUP     |     |       |
| ATOM CBA  | CT2 | -0.34 |
| ATOM HBA1 | HA  | 0.15  |
| ATOM HBA2 | HA  | 0.15  |
| ATOM CGA  | CC  | 0.50  |
| ATOM O1A  | OC  | -0.73 |
| ATOM O2A  | OC  | -0.73 |
| GROUP     |     |       |
| ATOM CMB  | CT3 | -0.48 |
| ATOM HMB1 | HA  | 0.16  |
| ATOM HMB2 | HA  | 0.16  |
| ATOM HMB3 | HA  | 0.16  |
| GROUP     |     |       |
| ATOM CAB  | C   | -0.20 |
| ATOM HAB  | HA  | 0.20  |
| GROUP     |     |       |
| ATOM CBB  | C   | -0.30 |
| ATOM HBB1 | HA  | 0.15  |
| ATOM HBB2 | HA  | 0.15  |
| GROUP     |     |       |
| ATOM CMC  | CT3 | -0.48 |
| ATOM HMC1 | HA  | 0.16  |
| ATOM HMC2 | HA  | 0.16  |
| ATOM HMC3 | HA  | 0.16  |
| GROUP     |     |       |
| ATOM CAC  | C   | -0.20 |
| ATOM HAC  | HA  | 0.20  |
| GROUP     |     |       |
| ATOM CBC  | C   | -0.30 |
| ATOM HBC1 | HA  | 0.15  |
| ATOM HBC2 | HA  | 0.15  |
| GROUP     |     |       |
| ATOM CMD  | CT3 | -0.48 |
| ATOM HMD1 | HA  | 0.16  |
| ATOM HMD2 | HA  | 0.16  |
| ATOM HMD3 | HA  | 0.16  |
| GROUP     |     |       |
| ATOM CAD  | CT2 | -0.30 |
| ATOM HAD1 | HA  | 0.15  |
| ATOM HAD2 | HA  | 0.15  |
| GROUP     |     |       |
| ATOM CBD  | CT2 | -0.34 |
| ATOM HBD1 | HA  | 0.15  |
| ATOM HBD2 | HA  | 0.15  |
| ATOM CGD  | CC  | 0.50  |
| ATOM O1D  | OC  | -0.73 |
| ATOM O2D  | OC  | -0.73 |

Fe and S related missing parameters were added from Autenrieth et al. (Autenrieth F, Tajkhorshid E, Baudry J, Luthey-Schulten Z (2004) Classical force field parameters for the heme prosthetic group of cytochrome c. *J Comput Chem* 25:1613-1622) and Bathelt et al. (Bathelt CM, Zurek J, Mulholland AJ, Harvey JN (2005) Electronic structure of compound I in human isoforms of cytochrome P450 from QM/MM modeling. *J Am Chem Soc* 127:12900-12908).

## 2. Testosterone topology file

\* testosterone 6oh topology

\*

```

MASS  93  HAL1  1.008000 H ! alphatic proton
MASS  94  HAL2  1.008000 H ! alphatic proton
MASS  95  HAL3  1.008000 H ! alphatic proton
MASS  96  HEL1  1.008000 H ! for alkene; RHC=CR
MASS  62  HOL  1.008000 H ! for H in hydroxyl group
MASS  65  CTL1 12.011000 C ! sp3 carbon with 1 H (-CH1-)
MASS  66  CTL2 12.011000 C ! carbon of methylene group (-CH2-)
MASS  67  CTL3 12.011000 C ! carbon of methyl group (-CH3)
MASS  97  CEL1 12.011000 C ! for alkene; RHC=CR
MASS  15  CEL2 12.011000 C ! for alkene; H2C=CR
MASS  69  OHL  15.99940 O ! hydroxyl oxygen
  
```

DECL -CA

DECL -C

DECL -O

DECL +CA

DEFAULT FIRST NONE LAST NONE

AUTO ANGLES DIHE

```

RESI TSTR  0.000000
GROUP
ATOM  C3  C   0.51
ATOM  O2  O  -0.51
GROUP
ATOM  C5  CEL1 -0.092
ATOM  HE1 HEL1  0.088
ATOM  C4  CEL1 -0.083
ATOM  C10 CTL1  0.087
GROUP
ATOM  C6  CTL1 -0.108
ATOM  H2  HAL1  0.054
ATOM  H1  HAL1  0.054
GROUP
ATOM  C14 CTL1 -0.204
ATOM  H26 HAL1  0.121
ATOM  C13 CTL1  0.083
GROUP
ATOM  H10 HAL1  0.104
ATOM  C9  CTL1 -0.159
ATOM  C11 CTL2  0.036
ATOM  H22 HAL2  0.012
ATOM  H23 HAL2  0.007
GROUP
ATOM  H14 HAL2  0.103
ATOM  H15 HAL2  0.091
ATOM  C7  CTL2 -0.187
ATOM  C8  CTL1 -0.190
ATOM  H11 HAL1  0.183
GROUP
ATOM  C17 CTL1 -0.008
ATOM  H18 HAL1  0.180
ATOM  O3  OHL  -0.566
  
```

```

ATOM HO HOL 0.394
GROUP
ATOM C16 CTL2 -0.108
ATOM H17 HAL2 0.054
ATOM H16 HAL2 0.054
GROUP
ATOM C18 CTL3 -0.018
ATOM H19 HAL3 0.006
ATOM H20 HAL3 0.006
ATOM H21 HAL3 0.006
GROUP
ATOM C2 CTL2 -0.162
ATOM H3 HAL2 0.081
ATOM H4 HAL2 0.081
GROUP
ATOM C1 CTL2 -0.118
ATOM H5 HAL2 0.059
ATOM H6 HAL2 0.059
GROUP
ATOM C19 CTL3 -0.144
ATOM H7 HAL3 0.048
ATOM H8 HAL3 0.048
ATOM H9 HAL3 0.048
GROUP
ATOM C12 CTL2 0.036
ATOM H24 HAL2 -0.018
ATOM H25 HAL2 -0.018
GROUP
ATOM C15 CTL2 -0.134
ATOM H12 HAL2 0.067
ATOM H13 HAL2 0.067
BOND C1 H5 C1 H6 C1 C2 C1 C10
BOND C2 H4 C2 H3 C2 C3
BOND C3 O2 C3 C4
BOND C4 HE1 C4 C5
BOND C5 C10 C5 C6
BOND C6 H1 C6 C7 C6 H2
BOND C7 H15 C7 H14 C7 C8
BOND C8 H11 C8 C9 C8 C14
BOND C9 H10 C9 C10 C9 C11
BOND C10 C19
BOND C11 H22 C11 H23 C11 C12
BOND C12 H24 C12 H25 C12 C13
BOND C13 C18 C13 C17 C13 C14
BOND C14 C15 C14 H26
BOND C15 H12 C15 H13 C15 C16
BOND C16 C17 C16 H17 C16 H16
BOND C17 H18 C17 O3
BOND C18 H19 C18 H20 C18 H21
BOND C19 H7 C19 H8 C19 H9 O3 HO
IMPR C19 C9 C10 C5
IMPR C18 C17 C13 C14
IMPR C12 C17 C13 C18
IMPR C17 C14 C13 C18
IMPR C14 C12 C13 C18
IMPR O3 C16 C17 C13
IMPR C4 C10 C5 C6
IMPR H11 C9 C8 C14
IMPR C15 C13 C14 C8
IMPR C4 C5 C3 HE1
IMPR C6 C4 C5 C10

```

IMPR C2 C4 C3 O2

PATCHING FIRS NONE LAST NONE

|        |     |      |     |        |          |           |          |        |
|--------|-----|------|-----|--------|----------|-----------|----------|--------|
| IC O2  | C3  | C4   | C5  | 1.2344 | 121.6394 | -179.2938 | 123.5448 | 1.3539 |
| IC O2  | C3  | C4   | HE1 | 1.2344 | 121.6394 | -6.8737   | 115.8687 | 1.0586 |
| IC C2  | C3  | C4   | C5  | 1.5028 | 117.4983 | -1.4695   | 123.5448 | 1.3539 |
| IC O2  | C3  | C2   | C1  | 1.2344 | 120.8259 | -150.9922 | 111.3406 | 1.5138 |
| IC O2  | C3  | C2   | H3  | 1.2344 | 120.8259 | -20.4986  | 115.4453 | 1.0014 |
| IC O2  | C3  | C2   | H4  | 1.2344 | 120.8259 | 94.4287   | 101.3031 | 0.8804 |
| IC C2  | C4  | *C3  | O2  | 1.5010 | 117.40   | 177.80    | 121.70   | 1.2320 |
| IC C3  | C5  | *C4  | HE1 | 1.5248 | 124.79   | 179.94    | 118.57   | 1.0971 |
| IC C4  | C3  | C2   | H3  | 1.4481 | 117.4983 | 161.6584  | 115.4453 | 1.0014 |
| IC C3  | C4  | C5   | C10 | 1.4481 | 123.5448 | -7.0199   | 121.9877 | 1.5327 |
| IC C3  | C4  | C5   | C6  | 1.4481 | 123.5448 | 170.4017  | 120.3593 | 1.4904 |
| IC C4  | C5  | C10  | C9  | 1.3539 | 121.9877 | -132.3047 | 107.0264 | 1.5651 |
| IC C4  | C5  | C10  | C19 | 1.3539 | 121.9877 | 106.2116  | 108.0069 | 1.5413 |
| IC C4  | C5  | C6   | H1  | 1.3539 | 120.3593 | 6.8895    | 105.7211 | 0.9895 |
| IC C4  | C5  | C6   | H2  | 1.3539 | 120.3593 | -112.6151 | 107.0076 | 0.9644 |
| IC C4  | C5  | C6   | C7  | 1.3539 | 120.3593 | 130.4844  | 111.7356 | 1.5434 |
| IC C10 | C4  | *C5  | C6  | 1.5532 | 116.94   | -179.98   | 120.08   | 1.3679 |
| IC C5  | C10 | C9   | C11 | 1.5327 | 107.0264 | 178.1346  | 112.1120 | 1.5548 |
| IC C5  | C10 | C9   | H10 | 1.5327 | 107.0264 | 60.8136   | 108.3432 | 1.0828 |
| IC C5  | C10 | C9   | C8  | 1.5327 | 107.0264 | -52.7866  | 113.4307 | 1.5440 |
| IC C5  | C10 | C1   | C2  | 1.5327 | 110.3179 | 44.8338   | 114.1190 | 1.5138 |
| IC C5  | C10 | C1   | H5  | 1.5327 | 110.3179 | -74.5786  | 104.4856 | 1.0064 |
| IC C5  | C10 | C1   | H6  | 1.5327 | 110.3179 | 170.4465  | 105.5003 | 0.9185 |
| IC C7  | H2  | *C6  | C5  | 1.5554 | 109.79   | 121.62    | 109.95   | 1.4930 |
| IC C5  | H2  | *C6  | H1  | 1.5484 | 109.95   | 115.61    | 103.27   | 1.4814 |
| IC H2  | C6  | C7   | C8  | 0.9670 | 109.79   | -63.5     | 111.81   | 1.5384 |
| IC C1  | C10 | C19  | H9  | 1.5394 | 110.5418 | -61.5091  | 106.6646 | 0.9094 |
| IC C5  | C10 | C19  | H7  | 1.5327 | 108.0069 | 60.8179   | 110.7569 | 1.0385 |
| IC C5  | C10 | C19  | H8  | 1.5327 | 108.0069 | -63.1393  | 109.5755 | 1.0585 |
| IC C8  | C10 | *C9  | C11 | 1.5715 | 112.46   | -127.75   | 113.03   | 1.5661 |
| IC C8  | C10 | *C9  | H10 | 1.5715 | 112.46   | 115.20    | 106.10   | 1.1100 |
| IC C9  | C5  | *C10 | C19 | 1.5860 | 110.19   | -122.48   | 108.65   | 1.5717 |
| IC C9  | C5  | *C10 | C1  | 1.5860 | 110.19   | 118.58    | 108.33   | 1.5792 |
| IC C5  | C6  | C7   | C8  | 1.4904 | 111.7356 | 53.1650   | 110.7696 | 1.5307 |
| IC C5  | C6  | C7   | H14 | 1.4904 | 111.7356 | -69.4176  | 112.7754 | 0.9473 |
| IC C5  | C6  | C7   | H15 | 1.4904 | 111.7356 | 168.4643  | 109.9922 | 1.0403 |
| IC C6  | C8  | *C7  | H15 | 1.5248 | 112.71   | -122.34   | 110.04   | 1.1056 |
| IC C6  | C8  | *C7  | H14 | 1.5248 | 112.71   | 121.93    | 109.40   | 1.1103 |
| IC C10 | C9  | C8   | C14 | 1.5860 | 112.46   | -177.70   | 109.53   | 1.5530 |
| IC C14 | C9  | *C8  | C7  | 1.5530 | 109.53   | -121.29   | 109.65   | 1.5572 |
| IC C7  | C9  | *C8  | H11 | 1.5572 | 109.65   | -118.43   | 109.45   | 1.1058 |
| IC C9  | C8  | C14  | C13 | 1.5715 | 109.53   | 57.19     | 115.16   | 1.5733 |
| IC C13 | C8  | *C14 | C15 | 1.5733 | 115.16   | 124.15    | 118.45   | 1.5558 |
| IC C8  | C14 | C13  | C17 | 1.5198 | 113.3538 | 177.8566  | 99.1606  | 1.5528 |
| IC C13 | C8  | *C14 | H26 | 1.5733 | 115.16   | -116.19   | 106.00   | 1.1112 |
| IC H26 | C14 | C13  | C17 | 1.1456 | 102.1091 | -65.8025  | 99.1606  | 1.5528 |
| IC H26 | C14 | C13  | C18 | 1.1456 | 102.1091 | 179.1162  | 113.1591 | 1.5232 |
| IC H26 | C14 | C13  | C12 | 1.1456 | 102.1091 | 54.2176   | 108.0403 | 1.5308 |
| IC C15 | C14 | C13  | C17 | 1.5392 | 104.2003 | 46.7414   | 99.1606  | 1.5528 |
| IC C17 | C14 | *C13 | C18 | 1.5861 | 100.15   | -117.12   | 112.56   | 1.5646 |
| IC C18 | C14 | *C13 | C12 | 1.5646 | 112.56   | -121.33   | 106.26   | 1.5620 |
| IC C8  | C14 | C13  | C17 | 1.5530 | 115.16   | 178.17    | 100.15   | 1.5861 |
| IC C13 | C14 | C8   | C9  | 1.5431 | 113.3538 | 58.2605   | 109.1035 | 1.5440 |
| IC H26 | C14 | C8   | H12 | 1.1456 | 108.3693 | -173.4467 | 107.8725 | 0.9743 |
| IC C13 | C14 | C15  | C16 | 1.5431 | 104.2003 | -32.9379  | 104.1198 | 1.5330 |
| IC H26 | C14 | C15  | H12 | 1.1456 | 108.1766 | -161.7415 | 110.2486 | 1.0435 |
| IC H26 | C14 | C15  | H13 | 1.1456 | 108.1766 | -29.6121  | 106.7957 | 1.0170 |

|        |     |      |     |        |          |           |          |        |
|--------|-----|------|-----|--------|----------|-----------|----------|--------|
| IC C16 | C14 | *C15 | H12 | 1.5750 | 103.65   | 119.22    | 110.78   | 1.1042 |
| IC H12 | C14 | *C15 | H13 | 1.1042 | 110.78   | 119.69    | 112.42   | 1.1025 |
| IC C14 | C13 | C17  | O3  | 1.5431 | 99.1606  | -161.5404 | 114.9010 | 1.4228 |
| IC C14 | C13 | C17  | H18 | 1.5431 | 99.1606  | 73.5699   | 113.4379 | 1.0862 |
| IC C16 | C13 | *C17 | H18 | 1.5879 | 103.30   | 113.79    | 106.39   | 1.1096 |
| IC C16 | H18 | *C17 | C13 | 1.5554 | 109.79   | 121.62    | 113.95   | 1.5530 |
| IC C13 | H18 | *C17 | O3  | 1.5484 | 113.95   | 128.61    | 107.27   | 1.4214 |
| IC C12 | C13 | C18  | H21 | 1.5308 | 112.2326 | -176.8153 | 110.6633 | 1.0498 |
| IC C14 | C13 | C18  | H19 | 1.5431 | 113.1591 | -63.6430  | 110.5362 | 0.8845 |
| IC C14 | C13 | C18  | H20 | 1.5431 | 113.1591 | 171.4897  | 114.1382 | 0.9941 |
| IC H19 | C13 | *C18 | H20 | 1.1033 | 110.55   | -119.68   | 111.78   | 1.1028 |
| IC H19 | C13 | *C18 | H21 | 1.1033 | 110.55   | 119.61    | 112.19   | 1.1018 |
| IC H7  | C10 | *C19 | H8  | 1.1021 | 111.45   | 119.42    | 110.93   | 1.1019 |
| IC H7  | C10 | *C19 | H9  | 1.1021 | 111.45   | -119.79   | 111.35   | 1.1031 |
| IC C14 | C13 | C12  | C11 | 1.5431 | 108.0403 | 57.3169   | 110.8625 | 1.5401 |
| IC C14 | C13 | C12  | H24 | 1.5431 | 108.0403 | -64.1758  | 105.2277 | 1.0268 |
| IC C14 | C13 | C12  | H25 | 1.5431 | 108.0403 | -178.7801 | 111.4882 | 1.0753 |
| IC C11 | C13 | *C12 | H24 | 1.5634 | 111.58   | -120.79   | 108.67   | 1.1085 |
| IC C11 | C13 | *C12 | H25 | 1.5634 | 111.58   | 121.62    | 111.81   | 1.1024 |
| IC C10 | C9  | C11  | C12 | 1.5651 | 112.1120 | 179.1474  | 113.1929 | 1.5401 |
| IC C10 | C9  | C11  | H22 | 1.5651 | 112.1120 | 58.2458   | 107.5491 | 1.0142 |
| IC C10 | C9  | C11  | H23 | 1.5651 | 112.1120 | -62.4416  | 108.2043 | 1.1186 |
| IC C12 | C9  | *C11 | H22 | 1.5634 | 114.01   | -121.93   | 109.80   | 1.1027 |
| IC H22 | C9  | *C11 | H23 | 1.1027 | 109.80   | -116.32   | 109.56   | 1.1045 |
| IC C10 | C9  | C8   | C14 | 1.5651 | 113.4307 | -179.3439 | 109.1035 | 1.5198 |
| IC C13 | C12 | C11  | C9  | 1.5308 | 110.8625 | -53.1491  | 113.1929 | 1.5548 |
| IC C6  | C7  | C8   | C14 | 1.5434 | 110.7696 | -177.4380 | 111.0609 | 1.5198 |
| IC C16 | C17 | O3   | HO  | 1.5589 | 109.4807 | 156.5484  | 110.1648 | 0.7841 |
| IC H18 | C17 | O3   | HO  | 1.1017 | 103.27   | 179.88    | 109.63   | 0.9872 |
| IC C13 | C17 | C16  | C15 | 1.5528 | 103.4469 | 23.2683   | 106.5419 | 1.5330 |
| IC C13 | C17 | C16  | H17 | 1.5528 | 103.4469 | -97.5247  | 110.2519 | 1.0376 |
| IC C13 | C17 | C16  | H16 | 1.5528 | 103.4469 | 141.5424  | 99.9022  | 0.9963 |
| IC C15 | C17 | *C16 | H17 | 1.5750 | 107.12   | -120.82   | 110.34   | 1.1040 |
| IC C15 | C17 | *C16 | H16 | 1.5750 | 107.12   | 121.24    | 110.92   | 1.1025 |
| IC C14 | C15 | C16  | C17 | 1.5392 | 104.1198 | 5.6394    | 106.5419 | 1.5589 |
| IC C3  | C2  | C1   | C10 | 1.5028 | 111.3406 | -53.5258  | 114.1190 | 1.5394 |
| IC C1  | C3  | *C2  | H4  | 1.5582 | 110.59   | 121.34    | 109.37   | 1.1037 |
| IC C1  | C3  | *C2  | H3  | 1.5582 | 110.59   | -121.75   | 109.32   | 1.1074 |
| IC C1  | H4  | *C2  | C3  | 1.5130 | 107.90   | -117.11   | 101.30   | 1.5040 |
| IC C3  | H4  | *C2  | H3  | 1.5040 | 101.30   | -121.00   | 107.00   | 1.0020 |
| IC C2  | C10 | *C1  | H5  | 1.5582 | 114.55   | 122.79    | 109.37   | 1.1042 |
| IC H5  | C10 | *C1  | H6  | 1.1042 | 109.37   | 116.06    | 108.25   | 1.1063 |

END

### 3. Ferric heme QM/MM optimized coordinates

C -6.112457 -3.493490 -2.649526  
O -5.951633 -3.366412 -3.893706  
N -5.099632 -3.397687 -1.772787  
H -5.279463 -3.454247 -0.766625  
C -3.712096 -3.183504 -2.218481  
H -3.639012 -2.204990 -2.697933  
C -2.788894 -3.252839 -1.000446  
H -2.796202 -4.267367 -0.595739  
H -3.112452 -2.544623 -0.236693  
C -3.274285 -4.288512 -3.196361  
O -3.177906 -5.465934 -2.804069  
S -0.998201 -2.870267 -1.482340  
FE -1.043614 -0.464155 -1.562068  
N -2.826292 0.099093 -0.603055  
N -0.095528 -0.148154 0.289418  
N 0.784053 -0.212449 -2.480374  
N -1.980856 0.006904 -3.373392  
C -4.064015 0.317649 -1.212722  
C -5.089728 0.461571 -0.194581  
C -4.462046 0.354849 1.028939  
C -3.055220 0.116469 0.773374  
C -0.709523 -0.200725 1.539322  
C 0.284963 -0.400252 2.579693  
C 1.518532 -0.469940 1.947467  
C 1.263522 -0.315858 0.513756  
C 2.019098 -0.362468 -1.859562  
C 3.061998 -0.471763 -2.860851  
C 2.450096 -0.344928 -4.099862  
C 1.015057 -0.198793 -3.850946  
C -1.352581 0.065315 -4.608154  
C -2.337209 0.368824 -5.639431  
C -3.561695 0.508344 -5.012567  
C -3.321773 0.297410 -3.590528  
C -4.280163 0.403542 -2.585164  
H -5.296692 0.602232 -2.904307  
C -2.080197 -0.068396 1.750286  
H -2.423970 -0.093507 2.778533  
C 2.230060 -0.405279 -0.482455  
H 3.253691 -0.548082 -0.158103  
C 0.018617 -0.093780 -4.819467  
H 0.351895 -0.105322 -5.848632  
C -5.076111 0.523342 2.380214  
H -4.829051 -0.299083 3.058293  
H -6.166422 0.586638 2.317695  
H -4.718109 1.435231 2.871950  
C -6.554223 0.675660 -0.450132  
H -7.141177 0.177156 0.330813  
H -6.860674 0.193555 -1.383862  
C -6.985452 2.155689 -0.511722  
H -6.292039 2.725397 -1.147960  
H -6.941346 2.626007 0.479866  
C -8.384823 2.348176 -1.082793  
O -9.012927 1.338730 -1.558077  
O -8.856203 3.553046 -1.154562  
C -0.001334 -0.503311 4.046255  
H -0.026609 -1.548185 4.382718  
H -0.969240 -0.066433 4.308101



|   |           |           |           |
|---|-----------|-----------|-----------|
| H | 0.773152  | 0.009707  | 4.628297  |
| C | 2.847080  | -0.654678 | 2.517692  |
| H | 3.677590  | -0.304932 | 1.909799  |
| C | 3.145377  | -1.216555 | 3.704641  |
| H | 2.400476  | -1.629790 | 4.374618  |
| H | 4.176737  | -1.299353 | 4.030180  |
| C | 4.517145  | -0.678668 | -2.562797 |
| H | 4.688266  | -1.642860 | -2.067174 |
| H | 4.913165  | 0.094559  | -1.891786 |
| H | 5.128564  | -0.659841 | -3.467893 |
| C | 3.139519  | -0.391469 | -5.389310 |
| H | 4.010113  | -1.045001 | -5.417070 |
| C | 2.841287  | 0.297509  | -6.504518 |
| H | 3.432431  | 0.186413  | -7.407164 |
| H | 2.032286  | 1.020198  | -6.547252 |
| C | -2.038485 | 0.603199  | -7.088937 |
| H | -1.134499 | 0.081002  | -7.419513 |
| H | -1.892978 | 1.673053  | -7.292820 |
| H | -2.865828 | 0.262858  | -7.720531 |
| C | -4.895734 | 0.803373  | -5.655848 |
| H | -4.754831 | 1.480859  | -6.505720 |
| H | -5.548177 | 1.343017  | -4.959930 |
| C | -5.613760 | -0.482208 | -6.127320 |
| H | -5.710498 | -1.184709 | -5.285223 |
| H | -5.000526 | -1.002420 | -6.874550 |
| C | -7.017624 | -0.325605 | -6.740465 |
| O | -7.474581 | -1.361054 | -7.335424 |
| O | -7.665291 | 0.788043  | -6.587941 |
| N | -2.910022 | -3.867727 | -4.456900 |
| H | -3.116625 | -2.919633 | -4.738797 |
| h | -7.082439 | -3.757603 | -2.228284 |
| h | -2.647003 | -4.476269 | -5.205545 |

## 4. Additional figures

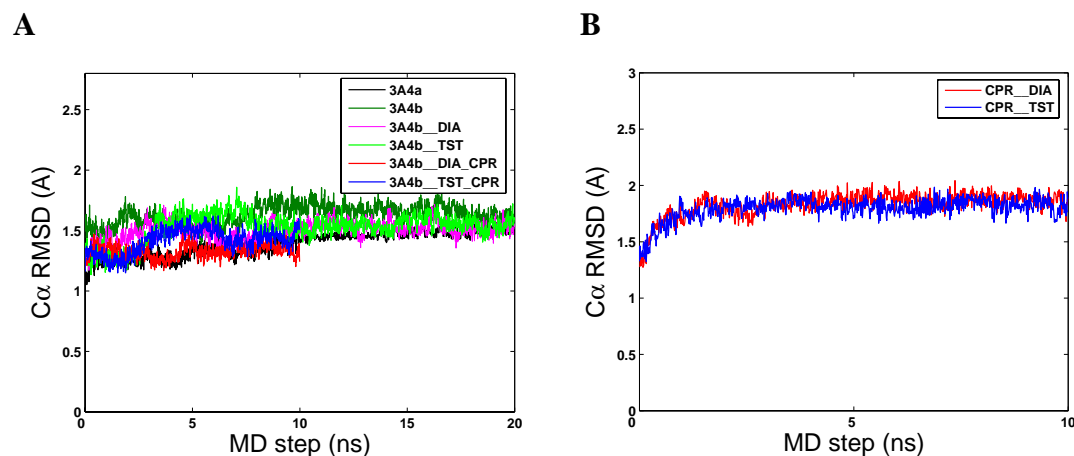

**Figure S1.** C $\alpha$  RMSD plots of CYP3A4 in all MD simulations along time compared to their initial PDB structures. A) 3A4a, 3A4b, 3A4b\_DIA, 3A4b\_TST, 3A4b\_DIA\_CPR, 3A4b\_TST\_CPR are colored black, dark green, pink, green, red and blue respectively. B) C $\alpha$  RMSD plots of CPR in the two CPR containing MD simulations along time compared to their initial PDB structures

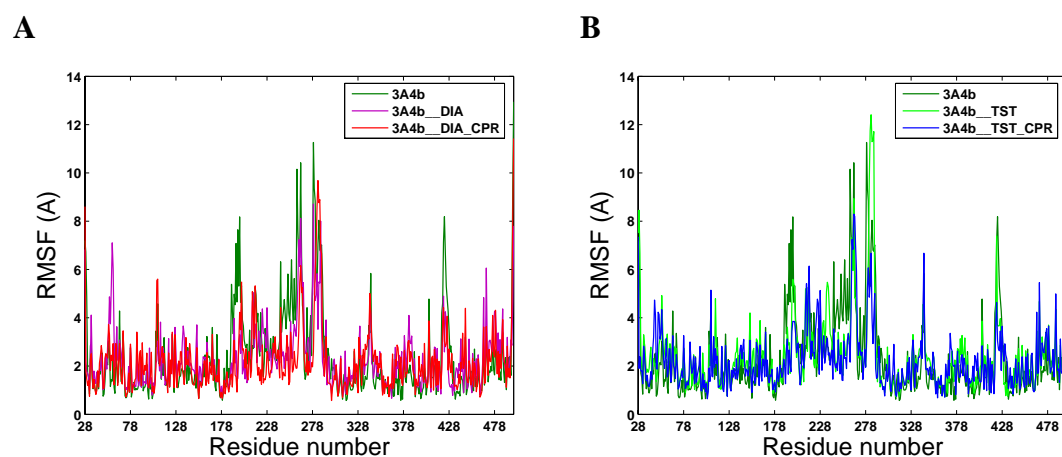

**Figure S2.** RMSF plots for CYP3A4 residues in all MD simulations. A) RMSF plots in unbound 3A4b (green), diazepam bound 3A4b\_DIA (pink) and diazepam plus CPR bound 3A4b\_DIA\_CPR (red) simulations. B) RMSF plots in unbound 3A4b (dark green), testosterone bound 3A4b\_TST (green) and testosterone plus CPR bound 3A4b\_TST\_CPR (blue) simulations.

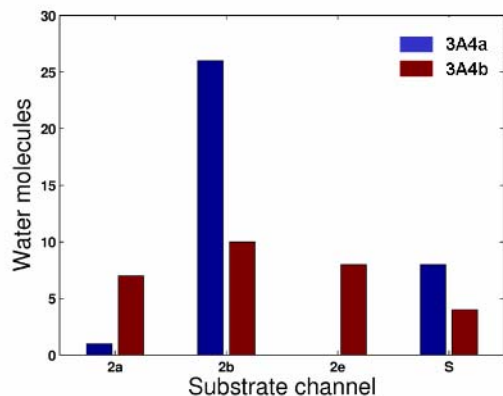

**Figure S3.** Number of water molecules penetrating through specific substrate access channels in the first 10ns of the unbound MD simulations. The access channels nomenclature is according ref. 4.

Explanation of the substrate channels types:

Below, the substrate access channels nomenclature follows Cojocaru et al. (Ref. 4): In the 3A4a simulation, we observed water molecules passing through channel 2b (located between the F' and G' helices,  $\beta$ 1 sheet and the BC loop, Fig. 2 in the manuscript) and the solvent channel denoted S. This observation is supported by the CYP102A1 (CYP<sub>BM3</sub>) substrate free structure in which there are between 17 and 21 water molecules along the 2b and S channels (Ref. 10). In the 3A4b simulation, we observed water molecules passing through channels 2b and S as well as through channel 2a (located between the  $\beta$ 1 sheet and F' helix) and channel 2e that passes through the BC loop.

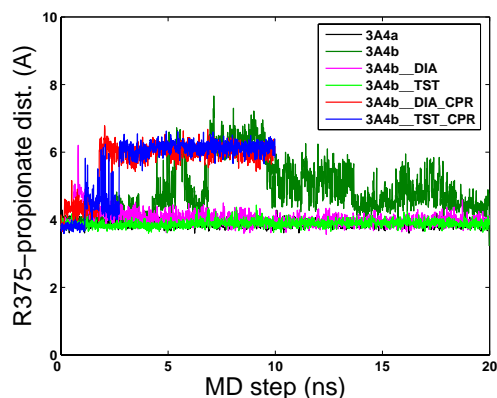

**Figure S4.** Distance between the heme 7-propionates and R375 all simulations. 3A4a, 3A4b, 3A4b\_DIA, 3A4b\_TST, 3A4b\_DIA\_CPR, 3A4b\_TST\_CPR plots are colored black, dark green, pink, green, red and blue respectively.

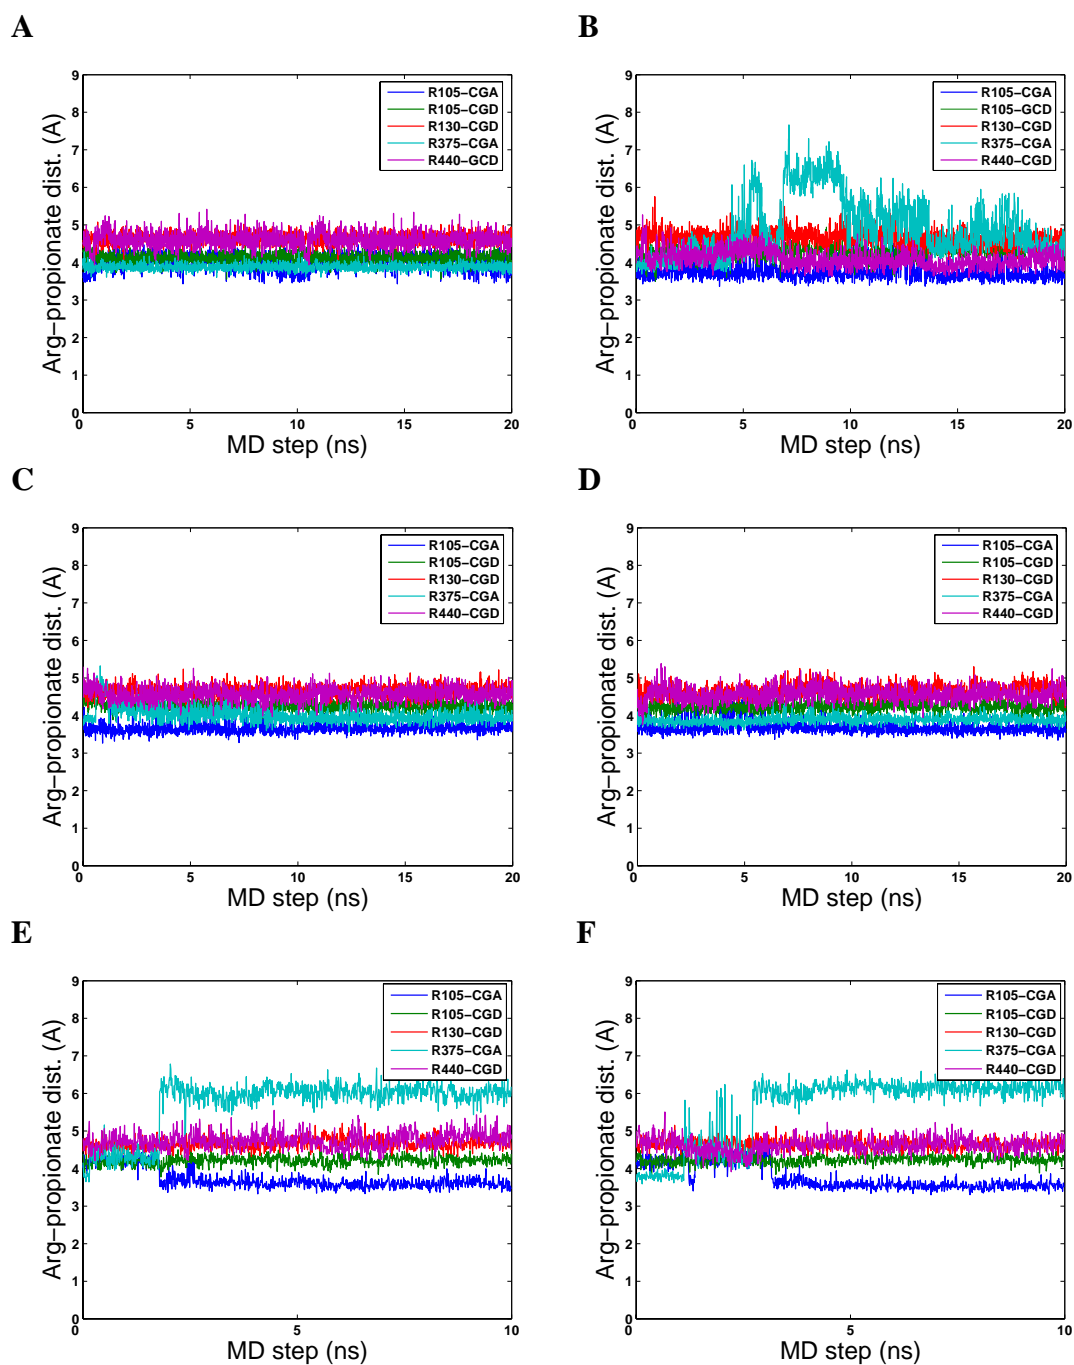

**Figure S5.** Distance between the heme 7-propionates and R105 (blue and green), R130 (red), R375 (cyan) and R440 (purple) along the following MD simulations: A) 3A4a; B) 3A4b; C) 3A4b\_DIA; D) 3A4b\_TST; E) 3A4b\_DIA\_CPR and F) 3A4b\_TST\_CPR.

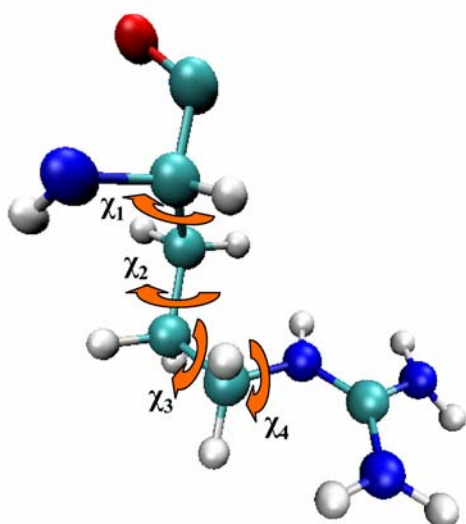

**Figure S6.**  $\chi$  side chain torsion angles of R375.

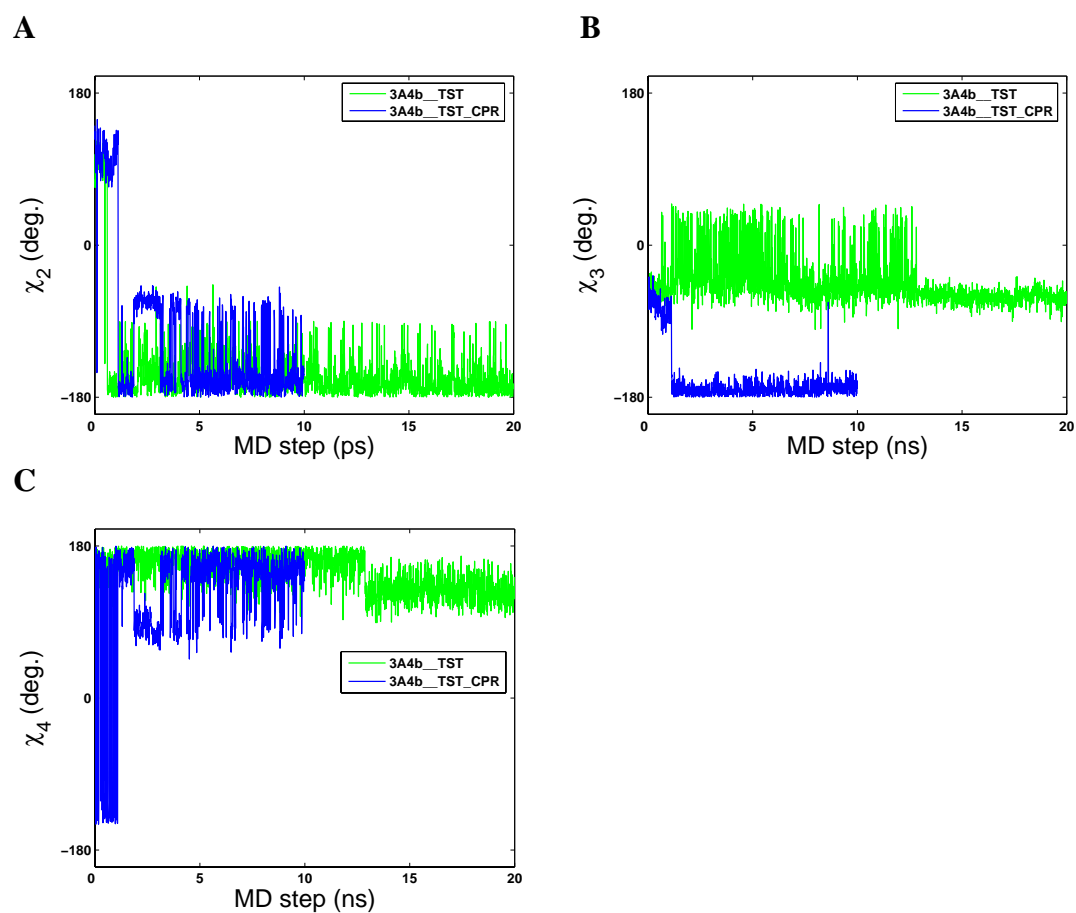

**Figure S7.**  $\chi$  side chain torsion angles of R375 along the testosterone (green) and testosterone plus CPR (blue) containing MD simulations (A)  $\chi_2$  (B)  $\chi_3$  (C)  $\chi_4$ .

**A**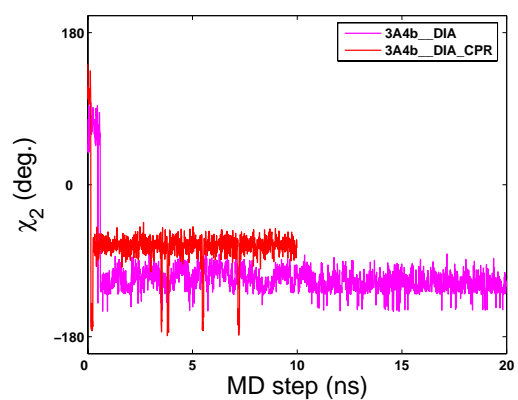**B**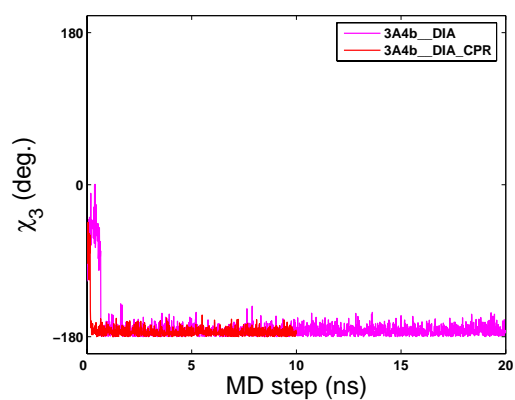**C**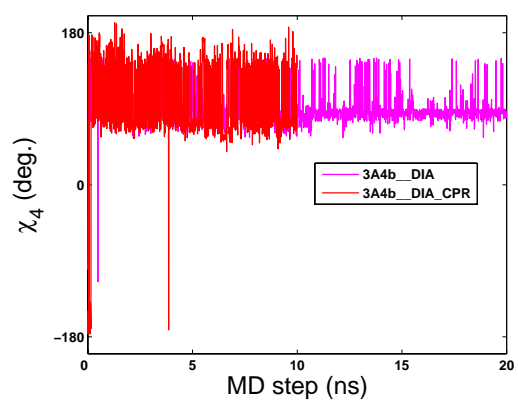

**Figure S8.**  $\chi$  side chain torsion angles of R375 along the diazepam (pink) and diazepam plus CPR (red) containing MD simulations (A)  $\chi_2$  (B)  $\chi_3$  (C)  $\chi_4$ .

**A**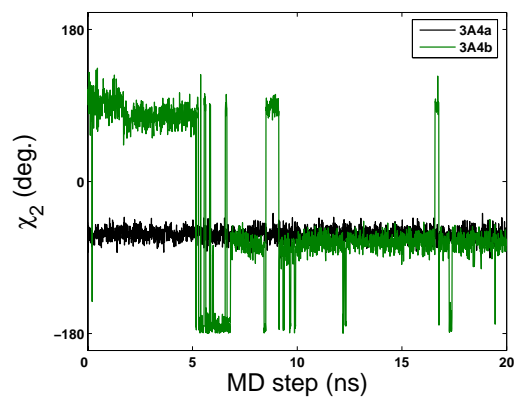**B**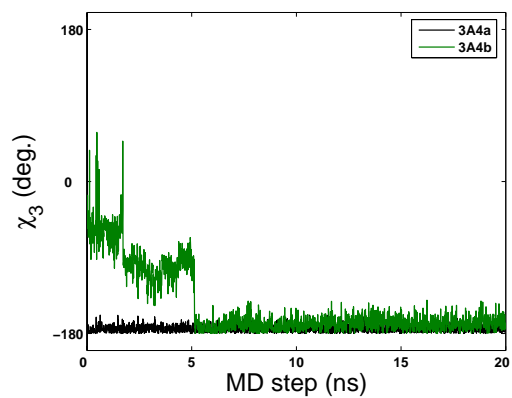**C**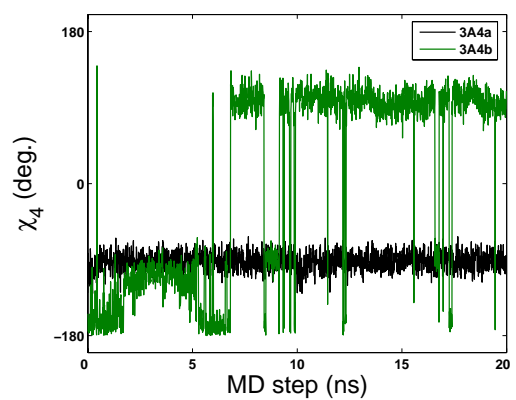

**Figure S9.**  $\chi$  side chain torsion angles of R375 along the substrate free MD simulations. CYP3A4 conformers are colored black and green for the 3A4a and 3A4b conformers. (A)  $\chi_2$  (B)  $\chi_3$  (C)  $\chi_4$ .

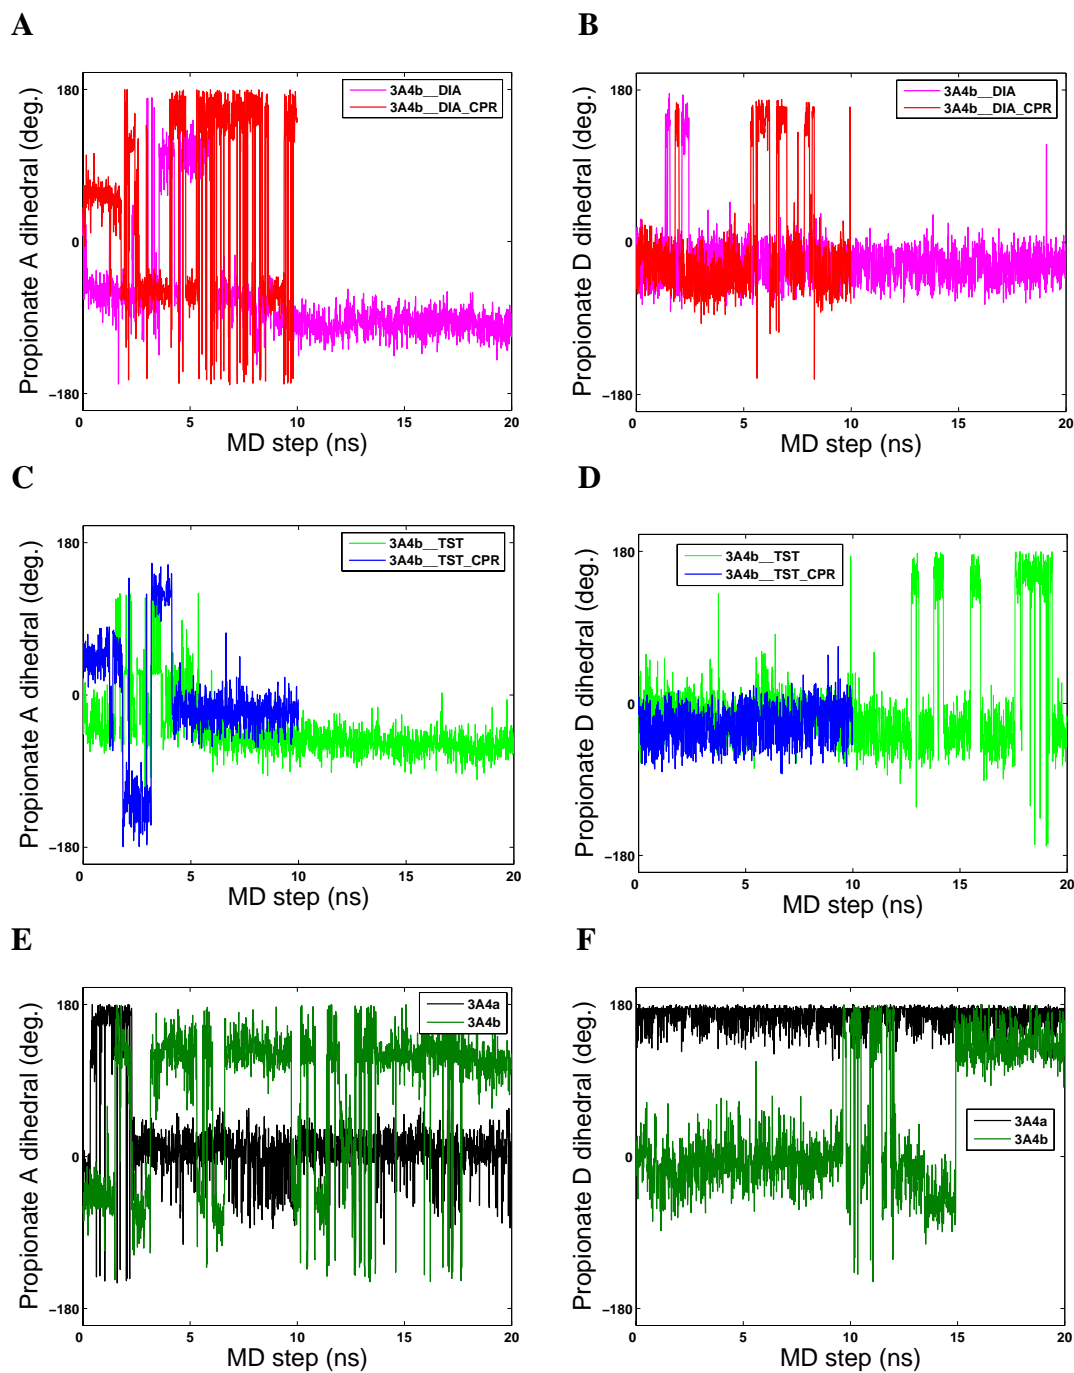

**Figure S10.** Propionates dihedral angles along MD simulations. A) Propionate A (7-propionate) dihedral angle along the diazepam containing MD simulations with CPR (red) and without CPR (pink). B) Propionate D (6-propionate) dihedral angle along the diazepam containing MD simulations with CPR (red) and without CPR (pink). C) Propionate A (7-propionate) dihedral angle along the testosterone containing MD simulations with CPR (blue) and without CPR (green). D) Propionate D (6-propionate) dihedral angle along the testosterone containing MD simulations with CPR (blue) and without CPR (green). E) Propionate A (7-propionate) dihedral angle along the substrate free MD simulations. F) Propionate D (6-propionate) dihedral angle along the substrate free MD simulations.



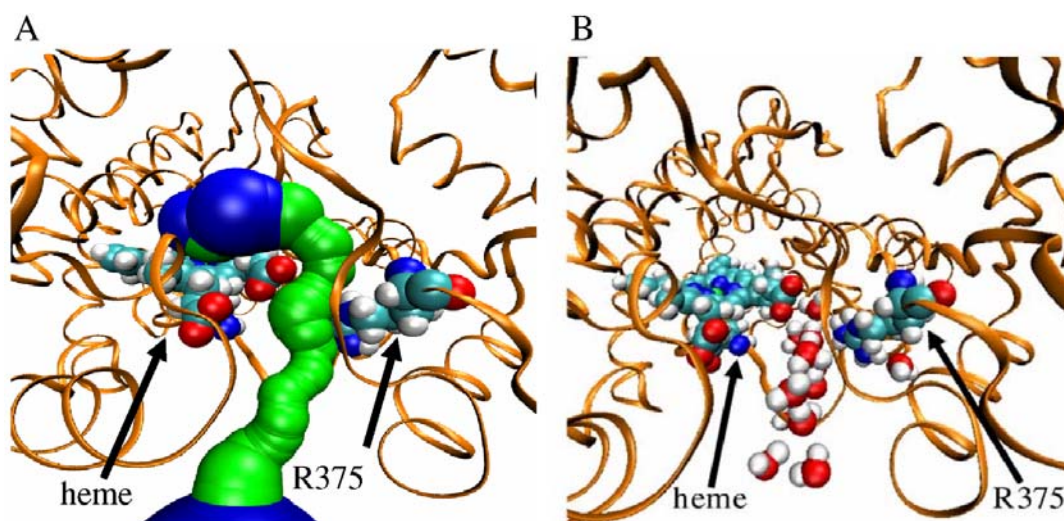

**Figure S11.** A) The surface of the aqueduct as calculated by MolAxis. Green spheres indicate channel radius under 2.7Å. The heme and R375 are represented as VDW spheres. The protein is colored orange. B) Explicit representation of the aqueduct with the ordered water molecules shown outside the active site. The heme, R375 and water molecules are represented by VDW spheres. Both figures share the same view.

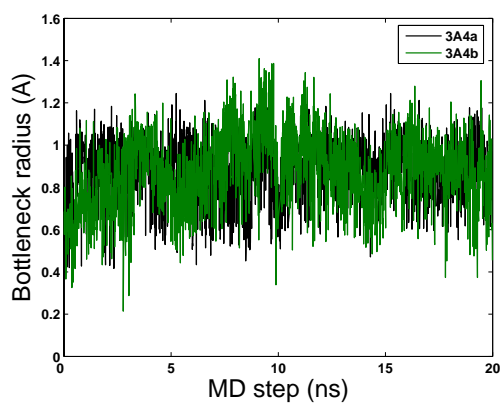

**Figure S12.** Aqueduct bottleneck radii along the unbound simulations 3A4a (black) and 3A4b (green).

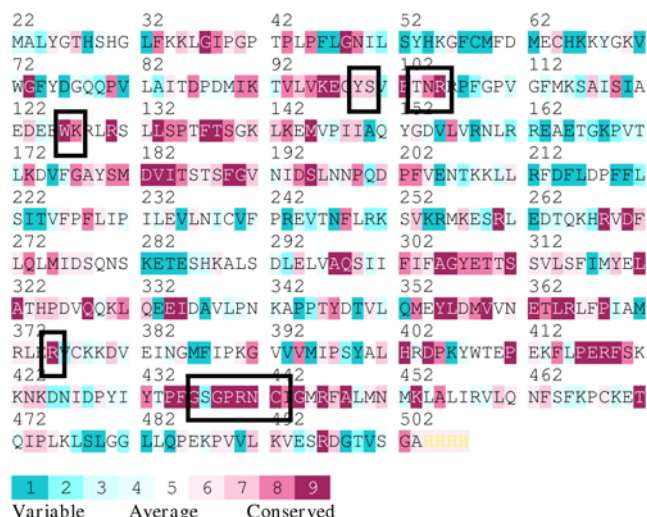

**Figure S13.** CYP3A4 sequence conservation calculated by ConSeq. The amino acids are colored according to the conservation scale at the bottom of the figure. Aqueduct residues are in black squares.

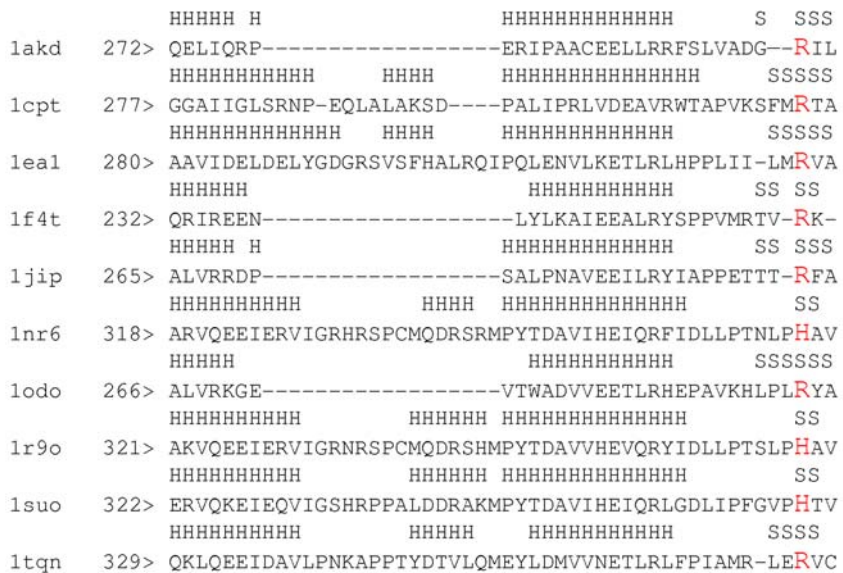

**Figure S14.** Multiple sequence alignment based on a multiple structure alignment of several P450s including: CYP<sub>cam</sub> (PDB code 1akd), CYP<sub>terp</sub> (PDB code 1cpt), CYP51 (PDB code 1ea1), CYP119 (PDB code 1f4t), CYP<sub>eryF</sub> (PDB code 1jip), CYP2C5 (PDB code 1nr6), CYP154a1 (PDB code 1odo), CYP2C9 (PDB code 1r9o), CYP2B4 (PDB code 1suo), CY3A4 (PDB code 1tqn). Secondary structure elements are listed as follows: H-  $\alpha$ -helix, S-  $\beta$  strand. The R375 position is highlighted and colored red.

**A**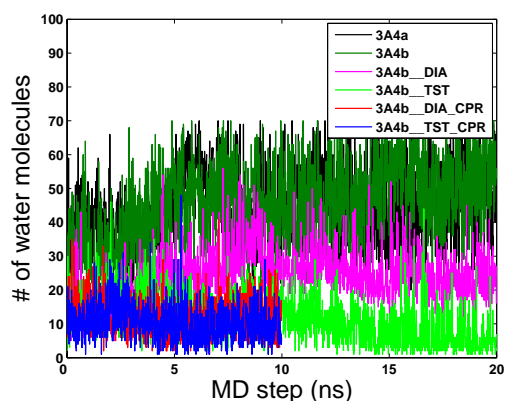**B**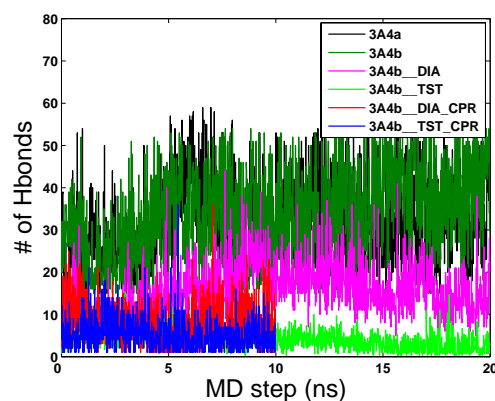

**Figure S15.** A) Number of active site water molecules along MD all simulations. 3A4a, 3A4b, 3A4b\_DIA, 3A4b\_TST, 3A4b\_DIA\_CPR, 3A4b\_TST\_CPR are colored black, dark green, pink, green, red and blue respectively. B) Number of hydrogen bonds between water molecules inside the CYP3A4 active site along all MD simulations. 3A4a, 3A4b, 3A4b\_DIA, 3A4b\_TST, 3A4b\_DIA\_CPR, 3A4b\_TST\_CPR are colored black, dark green, pink, green, red and blue respectively.

Explanation to how active site water molecules were detected and hydrogen bonds were calculated:

The space of the active site was defined as follows: We identified all channels emanating from the active site by MolAxis, and the active site boundaries were defined as the bottlenecks of all the channels. Then, we detected water molecules located inside all the channels spheres and these were assigned as active site water molecules. We considered a hydrogen bond between two water molecules if they meet two criteria: An O---O length shorter than 3.1 Å and an O-H---O angle greater than 146°, according to Khan et al. (Ref. 41).

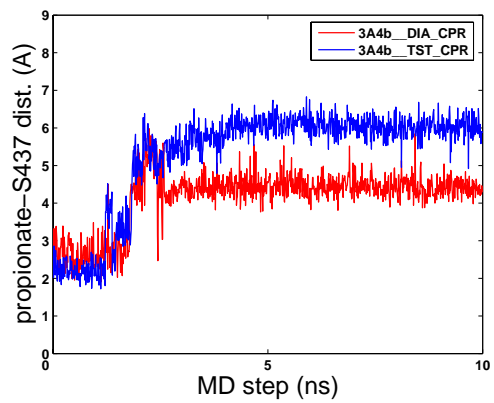

**Figure S16.** Hydrogen bond distance between the S437 carbonyl group and the 7-propionate in the 3A4b\_DIA\_CPR (red) and 3A4b\_TST\_CPR (blue) MDs.

**Table S1.** CYP3A4-CPR key interacting residues in descending order according to number of close contacts.

| <b>3A4b_DIA_CPR</b> | <b>3A4b_TST_CPR</b> |
|---------------------|---------------------|
| LYS424_TRP574       | LYS424_TRP574       |
| PRO135_ASP499       | SER131_ARG498       |
| TYR99_THR515        | ARG446_FMN631       |
| ARG446_THR496       | TYR99_THR515        |
| ARG130_GLU494       | ARG130_ARG498       |
| LYS421_ASN573       | PRO429_FMN631       |
| SER139_TYR613       | ASN441_MET490       |
| THR138_ASP499       | PRO135_ARG498       |
| PRO439_TYR486       | VAL95_ASN489        |
| SER131_VAL513       | LYS143_PHE609       |
| ILE443_GLU494       | ARG446_THR492       |
| SER139_PHE609       | GLU283_MET505       |
| THR138_THR496       | PRO135_ASP499       |
| TYR99_LEU516        | LEU351_ASN573       |
| PRO439_ASN543       | ARG130_GLU494       |
| ASP425_TRP574       | ASP425_THR576       |
| SER134_ARG498       | LYS96_ASP542        |
| SER134_GLU494       | LYS91_ASP542        |
| SER139_THR496       | MET445_FMN631       |
| ARG446_THR492       | GLY438_MET490       |
| ILE443_GLY495       | ARG446_ASP571       |
| LYS96_ASP542        | THR284_MET505       |
| LEU351_ASP607       | SER134_ARG498       |
| ASN441_GLY491       | PRO439_SER488       |
| GLY438_ASN489       | THR138_THR492       |
| LYS424_ASN573       | SER134_GLY495       |
| ASP425_ASN537       | LYS96_ASN543        |
| PRO429_FMN631       | ASN441_GLY491       |
| SER437_ASN489       | LYS424_ALA575       |
| PRO429_ASN489       | VAL95_ASN543        |
| GLU283_MET505       | LEU351_SER606       |
| VAL95_ASP542        | PRO135_GLY495       |
| MET445_MET490       | THR138_THR496       |
| ARG446_SER606       | GLY140_PHE609       |
| SER134_ASP499       | PRO439_ASN543       |
| LYS143_GLU610       | SER437_MET490       |
| PRO429_MET490       | PRO429_MET490       |
| ASN441_MET490       | GLU285_PRO511       |
| ASP425_THR576       | TYR99_TYR486        |
| PHE435_MET490       | SER134_GLU494       |
| VAL95_ASN543        | TYR430_ASN537       |
| VAL95_ASN489        | ASP428_ASN537       |
| LYS127_THR515       | LYS127_THR515       |
| SER286_MET505       | GLU285_ALA510       |

**Table S2:** positive residues that salt bridge the propionates moieties of the heme in different species.

| P450            | PDB code | 6-propionate     | 7-propionate |
|-----------------|----------|------------------|--------------|
| CYP108 (terp)   | 1CPT     | H110, R114, H375 | R319         |
| CYP101 (cam)    | 1AKD     | R112, H355       | R299         |
| Cyp107A1 (ERYF) | 1JIP     | H98, R102, H349  | R293         |
| CYP102 (BM-3)   | 1FAG     | K69, H100, R398  | K69          |
| CYP2B4          | 1SUO     | R125, R434       | R98, H369    |
| CYP2C9          | 1R9O     | R124, R433       | R97, H368    |
| CYP2C5          | 1NR6     | R124, R430       | R97, H365    |
| CYP3A4          | 1TQN     | R105, R130, R440 | R105, R375   |

## 5. Calculated *PKa* values (titratable groups)

| Amino acid | Charge |
|------------|--------|
| NTR+_0028_ | 1      |
| HIS+_0028_ | 0      |
| HIS+_0030_ | 0      |
| LYS+_0034_ | 1      |
| LYS+_0035_ | 1      |
| TYR-_0053_ | 0      |
| HIS+_0054_ | 0      |
| LYS+_0055_ | 1      |
| CYS-_0058_ | 0      |
| ASP-_0061_ | -1     |
| GLU-_0063_ | -1     |
| CYS-_0064_ | 0      |
| HIS+_0065_ | 0      |
| LYS+_0066_ | 1      |
| LYS+_0067_ | 1      |
| TYR-_0068_ | 0      |
| LYS+_0070_ | 1      |
| TYR-_0075_ | 0      |
| ASP-_0076_ | -1     |
| ASP-_0086_ | -1     |
| ASP-_0088_ | -1     |
| LYS+_0091_ | 1      |
| LYS+_0096_ | 1      |
| GLU-_0097_ | -1     |
| CYS-_0098_ | 0      |
| TYR-_0099_ | 0      |
| ARG+_0105_ | 1      |
| ARG+_0106_ | 1      |
| LYS+_0115_ | 1      |
| GLU-_0122_ | -1     |
| ASP-_0123_ | -1     |
| GLU-_0124_ | -1     |
| GLU-_0125_ | -1     |
| LYS+_0127_ | 1      |
| ARG+_0128_ | 1      |
| ARG+_0130_ | 1      |
| LYS+_0141_ | 1      |
| LYS+_0143_ | 1      |
| GLU-_0144_ | -1     |
| TYR-_0152_ | 0      |
| ASP-_0154_ | -1     |
| ARG+_0158_ | 1      |
| ARG+_0161_ | 1      |
| ARG+_0162_ | 1      |
| GLU-_0163_ | -1     |
| GLU-_0165_ | -1     |
| LYS+_0168_ | 1      |

|            |    |
|------------|----|
| LYS+ 0173_ | 1  |
| ASP- 0174_ | -1 |
| TYR- 0179_ | 0  |
| ASP- 0182_ | -1 |
| ASP- 0194_ | -1 |
| ASP- 0201_ | -1 |
| GLU- 0205_ | -1 |
| LYS+ 0208_ | 1  |
| LYS+ 0209_ | 1  |
| ARG+ 0212_ | 1  |
| ASP- 0214_ | -1 |
| ASP- 0217_ | -1 |
| GLU- 0234_ | -1 |
| CYS- 0239_ | 0  |
| ARG+ 0243_ | 1  |
| GLU- 0244_ | -1 |
| ARG+ 0250_ | 1  |
| LYS+ 0251_ | 1  |
| LYS+ 0254_ | 1  |
| ARG+ 0255_ | 1  |
| LYS+ 0257_ | 1  |
| GLU- 0258_ | -1 |
| ARG+ 0260_ | 1  |
| GLU- 0262_ | -1 |
| ASP- 0263_ | -1 |
| LYS+ 0266_ | 1  |
| HIS+ 0267_ | 0  |
| ARG+ 0268_ | 1  |
| ASP- 0270_ | -1 |
| ASP- 0277_ | -1 |
| LYS+ 0282_ | 1  |
| GLU- 0283_ | -1 |
| GLU- 0285_ | -1 |
| HIS+ 0287_ | 0  |
| LYS+ 0288_ | 1  |
| ASP- 0292_ | -1 |
| GLU- 0294_ | -1 |
| TYR- 0307_ | 0  |
| GLU- 0308_ | -1 |
| TYR- 0319_ | 0  |
| GLU- 0320_ | -1 |
| HIS+ 0324_ | 0  |
| ASP- 0326_ | -1 |
| LYS+ 0330_ | 1  |
| GLU- 0333_ | -1 |
| GLU- 0334_ | -1 |
| ASP- 0336_ | -1 |
| LYS+ 0342_ | 1  |
| TYR- 0347_ | 0  |
| ASP- 0348_ | -1 |
| GLU- 0354_ | -1 |



|            |    |
|------------|----|
| TYR-_0355_ | 0  |
| ASP-_0357_ | -1 |
| GLU-_0362_ | -1 |
| ARG+_0365_ | 1  |
| ARG+_0372_ | 1  |
| GLU-_0374_ | -1 |
| ARG+_0375_ | 1  |
| CYS-_0377_ | 0  |
| LYS+_0378_ | 1  |
| LYS+_0379_ | 1  |
| ASP-_0380_ | -1 |
| GLU-_0382_ | -1 |
| LYS+_0390_ | 1  |
| TYR-_0399_ | 0  |
| HIS+_0402_ | 0  |
| ARG+_0403_ | 1  |
| ASP-_0404_ | -1 |
| LYS+_0406_ | 1  |
| TYR-_0407_ | 0  |
| GLU-_0410_ | -1 |
| GLU-_0412_ | -1 |
| LYS+_0413_ | 1  |
| GLU-_0417_ | -1 |
| ARG+_0418_ | 1  |
| LYS+_0421_ | 1  |
| LYS+_0422_ | 1  |
| LYS+_0424_ | 1  |
| ASP-_0425_ | -1 |
| ASP-_0428_ | -1 |
| TYR-_0430_ | 0  |
| TYR-_0432_ | 0  |
| ARG+_0440_ | 1  |
| CYS-_0442_ | 0  |
| ARG+_0446_ | 1  |
| LYS+_0453_ | 1  |
| ARG+_0458_ | 1  |
| LYS+_0466_ | 1  |
| CYS-_0468_ | 0  |
| LYS+_0469_ | 1  |
| GLU-_0470_ | -1 |
| LYS+_0476_ | 1  |
| GLU-_0486_ | -1 |
| LYS+_0487_ | 1  |
| LYS+_0492_ | 1  |
| GLU-_0494_ | -1 |
| ARG+_0496_ | 1  |
| ASP-_0497_ | -1 |
| CTR-_0499_ | -1 |
| PAA-_0500_ | -1 |
| PDD-_0500_ | -1 |

We used DelPhi (Rocchia W, Alexov E, Honig B (2001) Extending the applicability of the non-linear Poisson–Boltzmann equation: multiple dielectric constants and multivalent ions. *J Phys Chem B* 105:6507-6514) as a Poisson-Boltzmann solver with a dielectric constant of 4
